# Supplementary material for: The effects of Sc and Nb substitution in Sr2FeReO6 double perovskites. A combined study of Xray powder diffraction and Mössbauer spectroscopy
Source: Royal Society of Chemistry journal article supplement (doi:10.1039/b007712g), 2001-01-01
Supplement: b007712g.doc [file b007712g.doc]

Supplementary material for ref. B007712G

Enlarged Rietveld fit for the Sr2FeReO6 composition

Enlarged Rietveld fit for the Sr2FeRe0.9Nb0.1O6 composition

Enlarged Rietveld fit for the Sr2FeRe0.9Sc0.1O6 composition

Enlarged Rietveld fit for the Sr2FeRe0.9Sc0.1O6 composition (between 23 and 31 degrees)
